# Supplementary material
Source: publisher figshare collection journal article supplement (https://acs.figshare.com/ndownloader/files/9579472)
Supplement: Supplementary file 1 [file 9579472]

## SUPPORTING INFORMATION

### Quantum Chemistry Analysis of Reaction Thermodynamics for Hydrogenation and Hydrogenolysis of Aromatic Biomass Model Compounds

Laurene Petitjean,<sup>b</sup> Raphael Gagne,<sup>a</sup> Evan Beach,<sup>b</sup> Jason An, Paul Anastas,<sup>b,\*</sup> and Dequan Xiao<sup>a,\*</sup>

<sup>a</sup> Laboratory for Integrative Materials Discovery  
Department of Chemistry and Chemical Engineering  
University of New Haven, 300 Boston Post Road, West Haven, CT 06516

<sup>b</sup> Center for Green Chemistry and Green Engineering,  
Yale University, 370 Prospect St., New Haven, CT 06520

\*Corresponding authors: dxiao@newhaven.edu, paul.anastas@yale.edu

Number of pages: 22  
Number of Figures: 10  
Number of Schemes: 1  
Number of Tables: 2

## **Table of Contents**

|                                                                                   |           |
|-----------------------------------------------------------------------------------|-----------|
| <b>1. Temperature dependence of the dielectric constant for methanol</b>          | <b>3</b>  |
| <b>2. Illustration of hydrogenation and hydrogenolysis reactions</b>              | <b>5</b>  |
| <b>3. Experimental Section</b>                                                    | <b>5</b>  |
| <i>a. General Experimental</i>                                                    | 6         |
| <i>b. Synthesis of the Cu-PMO Catalyst</i>                                        | 6         |
| <i>c. Synthesis of 2-methoxy-4-(methoxymethyl)phenol</i>                          | 7         |
| <i>d. General Procedures for Reduction of Lignin Model Compounds</i>              | 7         |
| <i>e. Model Compound Reductions Reactions</i>                                     | 8         |
| <i>f. Crude <sup>1</sup>H NMR of Reaction Mixtures (c.f. manuscript Scheme 2)</i> | 9         |
| <b>4. Optimized geometries</b>                                                    | <b>13</b> |
| <b>5. <sup>1</sup>H and <sup>13</sup>C NMR of isolated products</b>               | <b>18</b> |
| <b>6. References</b>                                                              | <b>22</b> |

1. Temperature dependence of the dielectric constant for methanol

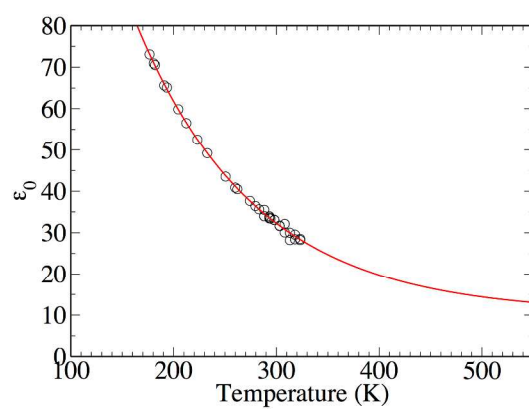

**Figure S1.** The variation of dielectric constants versus the change of temperature for methanol<sup>1-6</sup>.

**Table S1.** Dielectric constants of methanol in different temperatures in the literature. Reproduced from [http://www.ddbst.com/en/EED/PCP/DEC\\_C110.php](http://www.ddbst.com/en/EED/PCP/DEC_C110.php).

| T [K]  | Dielectric Constant [-] | State  | Reference |
|--------|-------------------------|--------|-----------|
| 176.60 | 73.08000                | Liquid | 1         |
| 180.70 | 70.91000                | Liquid |           |
| 182.00 | 70.52000                | Liquid |           |
| 190.90 | 65.64000                | Liquid |           |
| 193.50 | 65.10000                | Liquid |           |
| 204.60 | 59.85000                | Liquid |           |
| 212.30 | 56.51000                | Liquid |           |
| 223.10 | 52.50000                | Liquid |           |
| 232.70 | 49.19000                | Liquid |           |
| 250.60 | 43.52000                | Liquid |           |
| 260.00 | 40.85000                | Liquid |           |
| 262.00 | 40.48000                | Liquid |           |
| 274.20 | 37.68000                | Liquid |           |
| 279.50 | 36.45000                | Liquid |           |
| 283.15 | 35.65000                | Liquid | 2         |
| 288.00 | 34.00000                | Liquid | 3         |
| 288.15 | 34.00000                | Liquid | 4         |
| 288.15 | 35.53000                | Liquid | 5         |
| 293.15 | 33.45000                | Liquid | 6         |
| 293.15 | 33.71000                | Liquid | 2         |
| 293.15 | 33.95000                | Liquid | 5         |
| 294.20 | 33.42000                | Liquid | 1         |
| 298.00 | 33.10000                | Liquid | 3         |
| 298.15 | 33.05000                | Liquid | 5         |
| 298.15 | 33.10000                | Liquid | 4         |
| 303.15 | 31.62000                | Liquid | 5         |
| 303.15 | 31.71000                | Liquid | 2         |
| 308.00 | 32.12000                | Liquid | 3         |
| 308.15 | 30.08000                | Liquid | 5         |
| 308.15 | 32.12000                | Liquid | 4         |
| 313.15 | 28.20000                | Liquid | 6         |
| 313.15 | 29.98000                | Liquid | 2         |
| 318.00 | 28.44000                | Liquid | 3         |
| 318.15 | 28.44000                | Liquid | 4         |
| 318.15 | 29.54000                | Liquid | 5         |
| 323.15 | 28.24000                | Liquid | 2         |
| 323.15 | 28.53000                | Liquid | 5         |

## 2. Illustration of hydrogenation and hydrogenolysis reactions

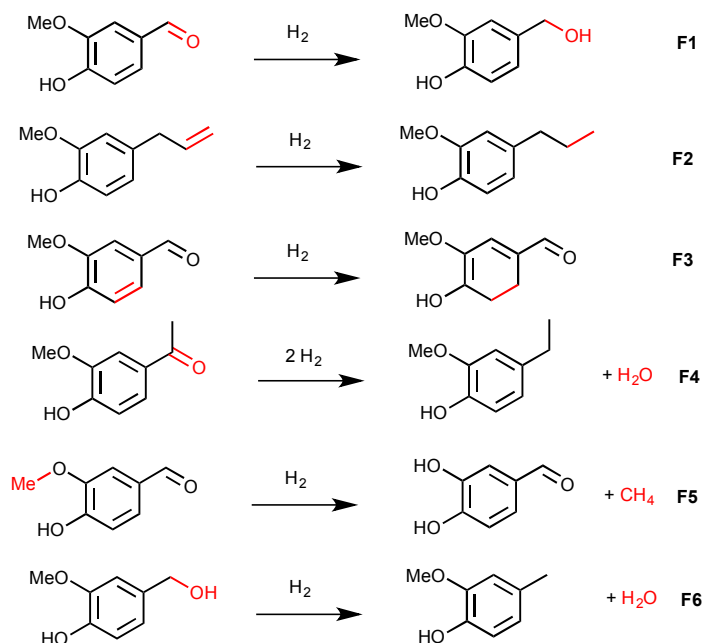

**Scheme S1.** Hydrogenation and hydrogenolysis reactions of functional groups F1-F6 as shown in Scheme 1.

## 3. Reaction Gibbs Free Energy for Hydrogenation of the aldehyde group in Vanillin with varying basis sets

**Table S2.** Reaction Gibbs free energy for the hydrogenation of the aldehyde group in vanillin at 1 bar and 298°C (F1).

|                       | 6-31g* | 6-311g* | cc-pvdz | cc-pvtz |
|-----------------------|--------|---------|---------|---------|
| $\Delta G$ (kcal/mol) | 9.76   | 9.51    | 9.24    | 7.96    |

## 4. Solvation Free Energies for F1-F6 in Methanol at 303 K

**Table S3.** Solvation Free Energies for F1-F6 in Methanol at 303 K

|                                          | F1      | F2     | F3    | F4     | F5     | F6     |
|------------------------------------------|---------|--------|-------|--------|--------|--------|
| $\Delta G_{\text{solvation}}$ (kcal/mol) | -0.5954 | 0.4712 | 1.600 | -4.109 | -1.318 | -3.763 |

## 5. Experimental Section

### a. General Experimental

Chemicals and solvents were purchased from EMD Millipore, Sigma-Aldrich, Alfa-Aesar, JT Baker, Merck or TCI and used as received. All hydrogenation reactions were set-up in a 100 mL stainless-steel Parr reactor equipped with a mechanical stirrer. The reactions were then pressurized under Hydrogen Atmosphere (*Tech Air*, Ultra High Purity). The loaded reactor was placed on the bench-top Parr stand equipped with a Parr 4843 reactor controller.

X-Ray Powder Diffraction (XRPD) measurements were performed on a Bruker D8-focus X-Ray diffractometer equipped with a Cu line-focus sealed tube, a divergent beam goniometer and a NaI scintillation detector. Measurements were made with a 40 kV, 40 mA beam in the range  $2\theta$  from  $3^\circ$  to  $80^\circ$  locked couple scan type, a step size of  $0.05^\circ$  and a scan speed of 1 second/step.

Proton nuclear magnetic resonance ( $^1\text{H}$  NMR) spectra were acquired using Agilent DD2 400 MHz, Agilent DD2 500 MHz, Agilent DD2 600 MHz or Varian Inova 500 MHz spectrometers. Chemical shifts ( $\delta$ ) are reported in parts per million (ppm) and are calibrated to the residual solvent peak. Coupling constants ( $J$ ) are reported in Hz. Multiplicities are reported using the following abbreviations: s = singlet; d = doublet; t = triplet; m = multiplet (range of multiplet is given).

Analytical thin layer chromatography was performed on pre-coated 250  $\mu\text{m}$  layer thickness silica gel 60 F<sub>254</sub> Plates (EMD Chemicals Inc.). Visualization was performed by ultraviolet light and/or by staining with potassium permanganate, vanillin or iodine. Purifications by column chromatography were performed using SilicaFlash F60 silica gel (40-63  $\mu\text{m}$ , 230-400 mesh, Silicycle).

### b. Synthesis of the Cu-PMO Catalyst

A solution of  $\text{Al}(\text{NO}_3)_3 \cdot 9\text{H}_2\text{O}$  (18.8 g, 0.05 mol, 1 equiv.),  $\text{Mg}(\text{NO}_3)_2 \cdot 6\text{H}_2\text{O}$  (30.76 g, 0.12 mol, 2.4 equiv.) and  $\text{Cu}(\text{NO}_3)_2 \cdot 2.5\text{H}_2\text{O}$  (7.0g, 0.03 mol, 0.6 equiv.) in 300 mL distilled (DI) water was added dropwise over four hours to a stirring solution of  $\text{Na}_2\text{CO}_3 \cdot \text{H}_2\text{O}$  (6.2 g, 0.05 mol, 1 equiv.) in 375 mL distilled water. The pH was kept constant at pH  $\sim$  10 by adding aliquots of 1 M NaOH aqueous solution. Upon completion of the addition, the mixture is allowed to stir vigorously at room temperature for three days. The blue precipitate is collected by vacuum filtration and washed with 1.5 L distilled water. The filter cake is then suspended in a solution of  $\text{Na}_2\text{CO}_3$  solution (62 g, 0.5 mol, 10 equiv.) in DI  $\text{H}_2\text{O}$  (250 mL, 2M) and allowed to stir at room temperature overnight. Upon completion, the precipitate is collected by vacuum filtration and washed with DI  $\text{H}_2\text{O}$  (2.5 L). The filter is left to dry overnight in a 378.15 K oven to obtain copper doped hydrotalcite. The solid is ground by mortar and pestle and subjected to calcination at 733.15 K in air for 24 h to obtain Cu-PMO (9.21 g) as a green powder. The Cu-PMO was analyzed by XRPD (Figure S2).

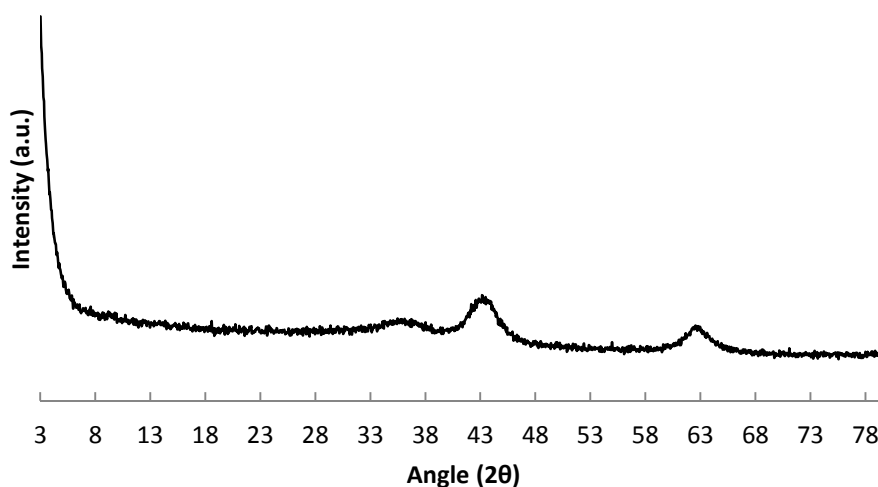

**Figure S2:** XPRD of Cu-PMO catalyst

*c. Synthesis of 2-methoxy-4-(methoxymethyl)phenol*

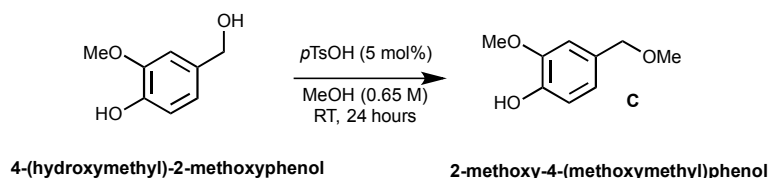

4-(hydroxymethyl)-2-methoxyphenol (5 g, 32.43 mmol, 1 equiv.) was added to a 250 mL round bottom flask equipped with a Teflon-coated stir bar. Methanol (50 mL, 0.65 M) was added by syringe. *P*-TsOH (308.5 mg, 1.62 mmol, 5 mol%) was added to the solution. The mixture was allowed to stir at room temperature for 24 hours. Upon completion,  $\text{NaHCO}_3$  (160 mg, 1.9 mmol, 0.058 equiv.) was added. The reaction was allowed to stir at room temperature for 15 minutes then concentrated *in vacuo*. The residue was dissolved in EtOAc and eluted through a pad of silica gel. The combined organic fractions were evaporated *in vacuo* to afford pure **C** in 99% yield (5.453 g).

$R_f = 0.51$  (silica gel, 1:1 Hexanes:EtOAc);

$^1\text{H NMR}$  (400 MHz, Chloroform-*d*)  $\delta$  6.89 – 6.82 (m, 2H), 6.80 (dd,  $J = 8.0, 1.8$  Hz, 1H), 5.65 (s, 1H), 4.36 (s, 2H), 3.88 (s, 3H), 3.35 (s, 3H).

Analytical data is identical to that reported in the literature.<sup>7</sup>

*d. General Procedures for Reduction of Lignin Model Compounds*

Lignin model compound (1 equiv.), Cu-PMO (11 mol%, if applicable) and dodecane (if applicable, internal standard) were added to a 100 mL Parr reactor. Methanol (0.21 M)

was added by syringe. The reaction vessel was sealed and pressurized to the appropriate pressure of hydrogen. The sealed reactor was placed on the Parr stand and connected to the Parr controller. The heating mantle was lifted to the Parr reactor and heating was turned on. The reaction was allowed to stir vigorously for the appropriate amount of time at a set temperature. Pressure and temperature time points were recorded. Upon completion, the heating mantle was lowered and the Parr reactor was cooled with a slow stream of water until it reached 313.15 K internal temperature. At this point, the Parr reactor was lifted from its stand and placed in a tap water bath until internal temperature reached 292.15 K. The internal pressure was released and the Parr reactor was opened. The mixture was filtered (over filter paper) and concentrated *in vacuo* to afford a residue which was analyzed directly by  $^1\text{H}$  NMR (after addition of 0.15 equiv. Dimethylformamide (DMF) as an internal standard).

*e. Model Compound Reductions Reactions*

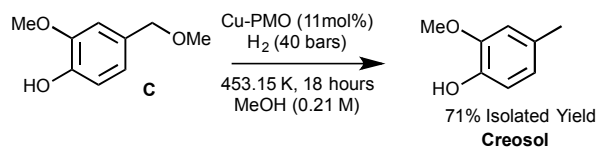

This reaction was performed using **C** (1105.4 mg, 6.572 mmol, 1 equiv.) and Cu-PMO (239 mg, 0.723 mmol, 11 mol%) in methanol (31.3 mL) according to the representative procedure outlined above. The reaction was allowed to stir for 18 hours at 453.15 K under 40 bars of  $\text{H}_2$ . The product was isolated by column chromatography (5% EtOAc in Hexanes to 10% EtOAc in Hexanes) to obtain pure product in 71 % yield.

$R_f$  = 0.39 (silica gel, 3:1 Hexanes:EtOAc);  $^1\text{H}$  NMR (400 MHz, Chloroform-*d*)  $\delta$  6.81 (d,  $J$  = 7.8 Hz, 1H), 6.66 (d,  $J$  = 8.8 Hz, 2H), 5.44 (s, 1H), 3.87 (s, 3H), 2.29 (s, 3H).

Analytical data is identical to that reported in the literature.<sup>8</sup>

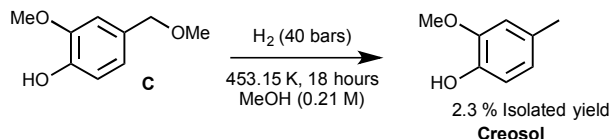

This reaction was performed using **C** (1105.4 mg, 6.572 mmol, 1 equiv.) in methanol (31.3 mL) according to the representative procedure outlined above. The reaction was allowed to stir for 18 hours at 453.15 K under 40 bars of  $\text{H}_2$ . The product was isolated by column chromatography (5% EtOAc in Hexanes to 10% EtOAc in Hexanes) to obtain pure product in 2.3 % yield.

$R_f$  = 0.39 (silica gel, 3:1 Hexanes:EtOAc);  $^1\text{H}$  NMR (400 MHz, Chloroform-*d*)  $\delta$  6.81 (d,  $J$  = 7.8 Hz, 1H), 6.66 (d,  $J$  = 8.8 Hz, 2H), 5.44 (s, 1H), 3.87 (s, 3H), 2.29 (s, 3H).

Analytical data is identical to that reported in the literature.<sup>8</sup>



*f. Crude  $^1\text{H}$  NMR of Reaction Mixtures (c.f. manuscript Scheme 2)*

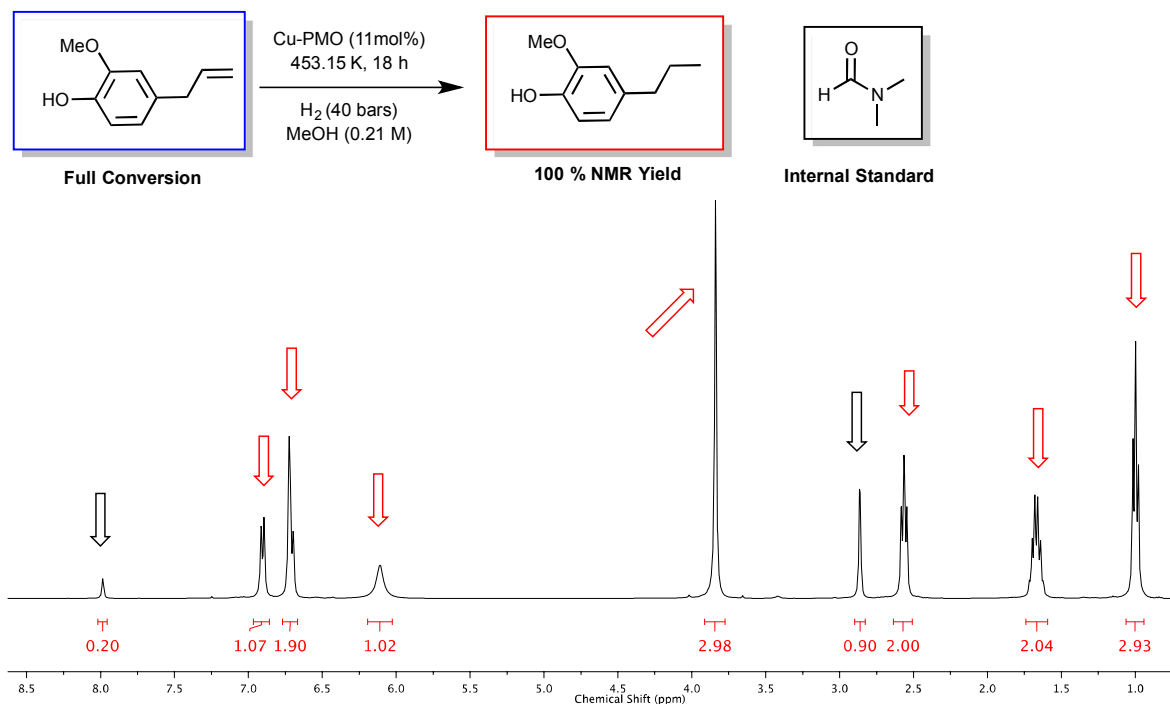

**Figure S3:** Crude NMR of a reaction showing complete conversion to dehydroeugenol. Conditions: Eugenol (6.456 mmol), Cu-PMO (11 mol%), MeOH (0.21 M),  $\text{H}_2$  (40 bars), 453.15 K, 18 h, DMF (as internal standard, 0.15 equiv.).

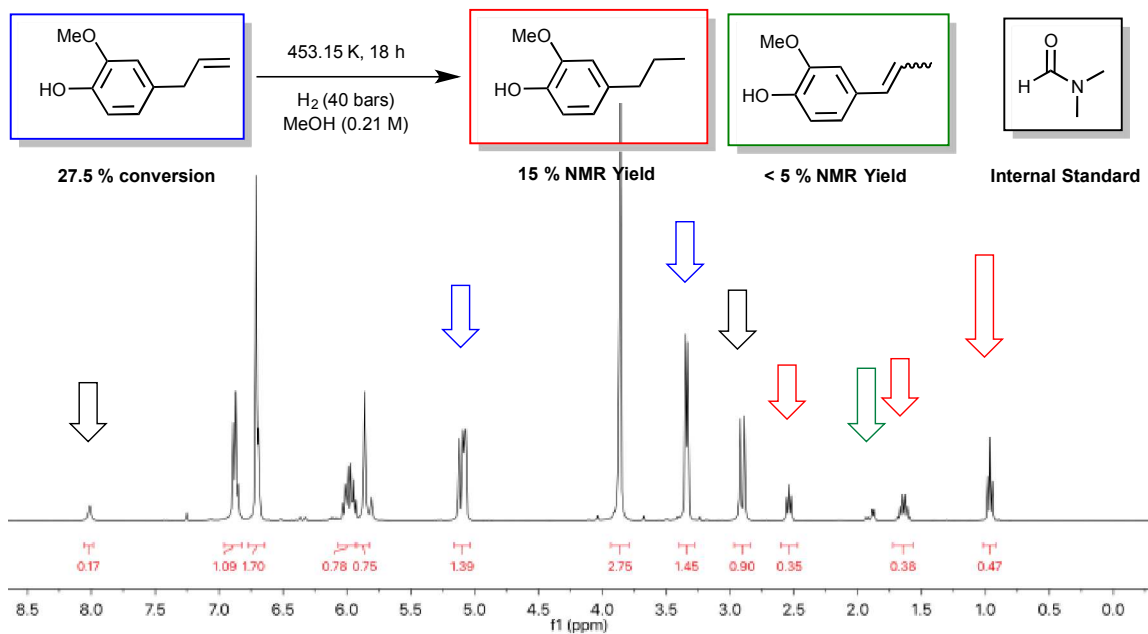

**Figure S4:** Crude NMR of a reaction showing eugenol (27.5% conversion) and dehydroeugenol (15% NMR yield). Conditions: Eugenol (6.456 mmol), MeOH (0.21 M), H<sub>2</sub> (40 bars), 453.15 K, 18 h, DMF (as internal standard, 0.15 equiv.).

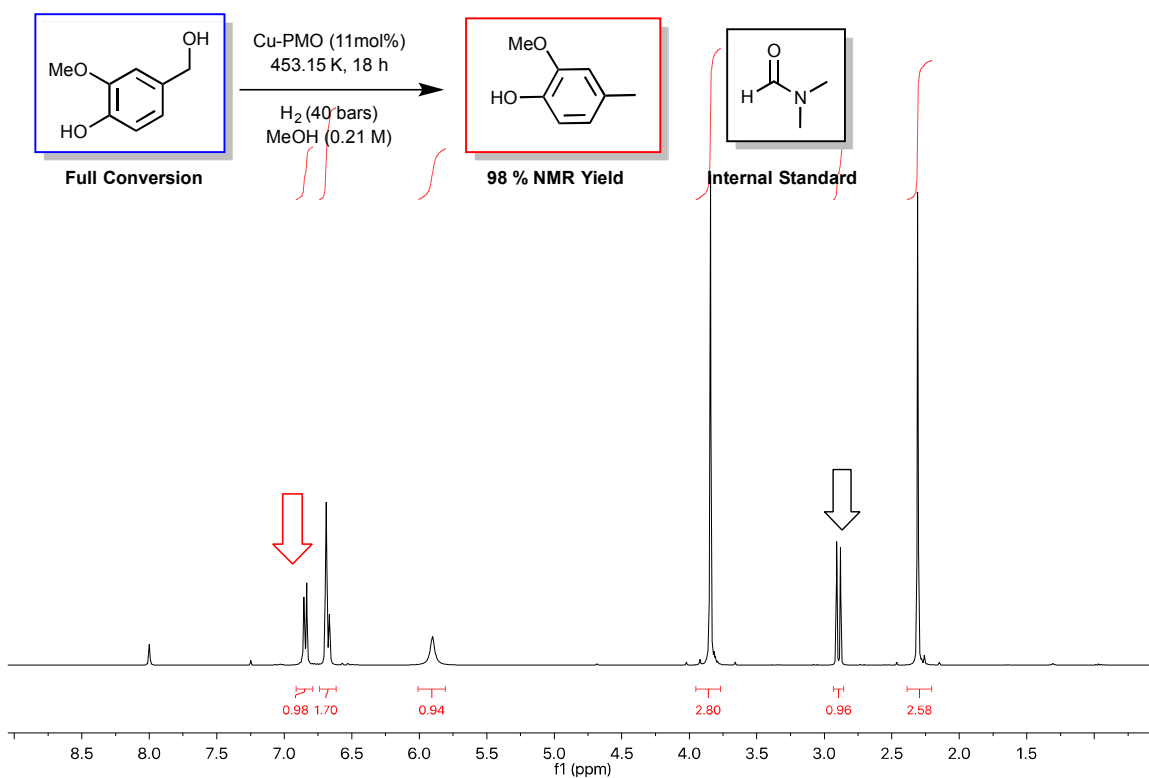

**Figure S5:** Crude NMR of a reaction showing vanillyl alcohol (100% conversion) and creosol (98% NMR yield). Conditions: Vanillyl alcohol (6.572 mmol), MeOH (0.21 M), H<sub>2</sub> (40 bars), 453.15 K, 18 h, DMF (as internal standard, 0.16 equiv.).

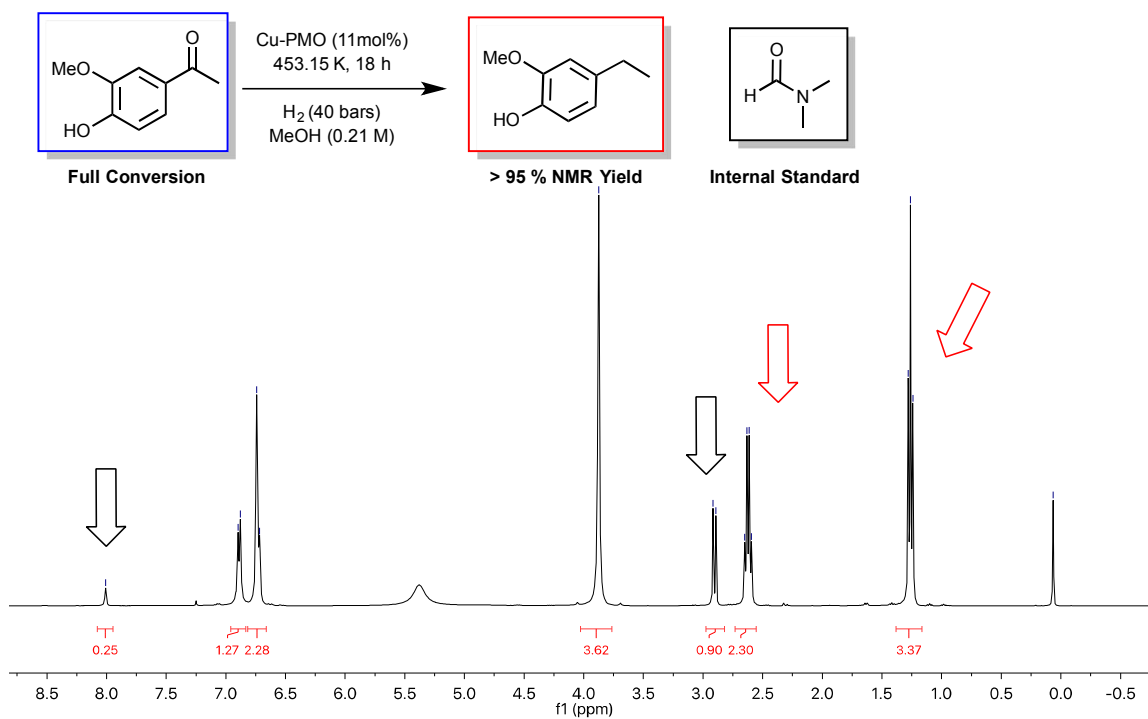

**Figure S6:** Crude NMR of a reaction showing acetovanillone (100% conversion) and 4-ethyl-2-methoxyphenol (> 95% NMR yield). Conditions: Acetovanillone (6.456 mmol), Cu-PMO (11 mol%), MeOH (0.21 M), H<sub>2</sub> (40 bars), 453.15 K, 18 h, DMF (as internal standard, 0.15 equiv.).

## 6. Optimized geometries

The following are the optimized geometry by NWChem using the DFT/6-31g\* method.

### Compound 1 (Vanillin)

19

|   |          |          |          |
|---|----------|----------|----------|
| C | 1.77535  | 0.18931  | -0.09650 |
| C | 1.04216  | -0.99381 | -0.26255 |
| C | 1.12633  | 1.41095  | 0.01923  |
| C | -0.36890 | -0.95105 | -0.29415 |
| C | -0.27356 | 1.46657  | -0.02738 |
| C | -1.00539 | 0.27956  | -0.17896 |
| O | -1.12181 | -2.07598 | -0.51119 |
| O | 1.63883  | -2.21042 | -0.40673 |
| H | 2.60190  | -2.09352 | -0.38393 |
| C | -1.09365 | -3.06435 | 0.52407  |
| H | -1.78823 | -3.84582 | 0.20876  |
| H | -1.43395 | -2.63874 | 1.47729  |
| H | -0.09349 | -3.49025 | 0.64716  |
| H | -2.09168 | 0.29844  | -0.21910 |
| H | 2.86290  | 0.13920  | -0.07047 |
| H | 1.68339  | 2.33416  | 0.14195  |
| C | -0.97576 | 2.75819  | 0.08879  |
| O | -0.42944 | 3.83677  | 0.23480  |
| H | -2.08538 | 2.68752  | 0.03298  |

### Compound 2 (Vanillyl Alcohol)

21

|   |          |          |          |
|---|----------|----------|----------|
| C | 1.85630  | 0.06692  | -0.20577 |
| C | 1.09403  | -1.09311 | -0.35381 |
| C | 1.24464  | 1.31423  | -0.07807 |
| C | -0.31086 | -0.99883 | -0.34685 |
| C | -0.14778 | 1.42080  | -0.08500 |
| C | -0.90809 | 0.25268  | -0.20914 |
| O | -1.11610 | -2.09718 | -0.53133 |
| O | 1.65384  | -2.33523 | -0.51061 |
| H | 2.61887  | -2.23941 | -0.50028 |
| H | -1.99456 | 0.28961  | -0.20649 |
| H | 2.94308  | -0.00884 | -0.20082 |
| H | 1.84799  | 2.20758  | 0.03986  |
| C | -0.82830 | 2.76729  | -0.00266 |
| O | -0.03333 | 3.65585  | 0.77799  |
| H | -0.39652 | 4.54713  | 0.66682  |
| H | -1.83334 | 2.64462  | 0.43227  |
| H | -0.96862 | 3.17350  | -1.01933 |
| C | -1.07261 | -3.08547 | 0.50072  |
| H | -1.80583 | -3.84518 | 0.21967  |
| H | -1.35472 | -2.65061 | 1.46920  |
| H | -0.08188 | -3.54303 | 0.57950  |

Compound 3 (Eugenol)

24

|   |          |          |          |
|---|----------|----------|----------|
| C | 1.89881  | -0.32637 | -0.08478 |
| C | 1.24494  | 0.90232  | -0.21549 |
| C | -0.14779 | 0.96066  | -0.24668 |
| C | -0.87292 | -0.23741 | -0.13749 |
| C | -0.23149 | -1.46968 | -0.00676 |
| C | 1.17966  | -1.51309 | 0.01938  |
| O | 1.76615  | -2.74202 | 0.15172  |
| H | 2.98713  | -0.36397 | -0.06105 |
| H | -1.95693 | -0.19690 | -0.15785 |
| O | -0.85945 | -2.67596 | 0.10474  |
| H | 1.82718  | 1.81646  | -0.28705 |
| C | -0.87516 | 2.28758  | -0.41590 |
| C | -2.27541 | -2.69237 | 0.08408  |
| H | -2.56301 | -3.74077 | 0.18344  |
| H | -2.67224 | -2.29571 | -0.86049 |
| H | -2.70041 | -2.11943 | 0.91963  |
| H | 2.72796  | -2.61839 | 0.15577  |
| C | -0.40125 | 3.35949  | 0.53269  |
| H | -1.95065 | 2.11898  | -0.26254 |
| H | -0.76612 | 2.64976  | -1.44793 |
| C | 0.09404  | 4.54191  | 0.16469  |
| H | -0.47453 | 3.11597  | 1.59331  |
| H | 0.18974  | 4.81999  | -0.88333 |
| H | 0.41778  | 5.27973  | 0.89405  |

Compound 4 (Acetovanillone)

22

|   |          |          |          |
|---|----------|----------|----------|
| C | -1.51980 | -0.92534 | 0.00000  |
| C | -1.89227 | 0.40870  | 0.00000  |
| C | -0.94085 | 1.43840  | 0.00000  |
| C | 0.43192  | 1.11038  | 0.00000  |
| C | 0.78969  | -0.24180 | 0.00000  |
| C | -0.15908 | -1.27130 | 0.00000  |
| C | 0.18796  | -2.72521 | 0.00000  |
| O | -0.69669 | -3.57119 | 0.00000  |
| H | -2.94749 | 0.68025  | 0.00000  |
| O | -1.32786 | 2.75364  | 0.00000  |
| O | 1.49234  | 1.97037  | 0.00000  |
| H | 1.85395  | -0.44630 | 0.00000  |
| C | 1.64067  | -3.18635 | 0.00000  |
| H | -2.26014 | -1.71707 | 0.00000  |
| H | 2.38408  | -2.38858 | 0.00000  |
| H | 1.80016  | -3.81840 | -0.88015 |
| H | 1.80016  | -3.81840 | 0.88015  |
| H | -2.29730 | 2.78520  | 0.00000  |
| C | 1.33754  | 3.38904  | 0.00000  |
| H | 2.35783  | 3.77926  | 0.00000  |
| H | 0.81067  | 3.74038  | 0.89168  |
| H | 0.81067  | 3.74038  | -0.89168 |

Product for the hydrogenation of F3 on Compound 1

21

|   |          |          |          |
|---|----------|----------|----------|
| C | -0.07923 | -1.10422 | 0.05424  |
| C | -1.53865 | -0.95742 | -0.13413 |
| C | -2.08565 | 0.26274  | -0.24959 |
| C | -1.21558 | 1.49604  | -0.26191 |
| C | 0.06295  | 1.30552  | 0.56835  |
| C | 0.70374  | -0.05435 | 0.35578  |
| H | -3.15328 | 0.35476  | -0.42378 |
| H | 1.77090  | -0.16220 | 0.52132  |
| O | 0.31472  | -2.40554 | -0.10695 |
| C | 1.68909  | -2.71032 | 0.08588  |
| H | 2.31269  | -2.16958 | -0.63669 |
| H | 1.78898  | -3.78492 | -0.07380 |
| H | 2.00789  | -2.45429 | 1.10412  |
| O | -2.27755 | -2.10418 | -0.19093 |
| C | 1.07799  | 2.41099  | 0.33027  |
| O | 0.88872  | 3.39738  | -0.34349 |
| H | -1.65417 | -2.84916 | -0.14285 |
| H | -0.19058 | 1.38855  | 1.64547  |
| H | -1.76467 | 2.36351  | 0.11811  |
| H | -0.93470 | 1.75541  | -1.29531 |
| H | 2.05330  | 2.25811  | 0.85034  |

Product for the hydrogenolysis of F5 on compound 1

16

|   |          |          |          |
|---|----------|----------|----------|
| C | 1.57718  | -0.42478 | -0.00033 |
| C | 0.61039  | -1.43107 | 0.00089  |
| C | 1.18549  | 0.91013  | -0.00249 |
| C | -0.76143 | -1.11354 | -0.00006 |
| C | -0.17745 | 1.23670  | -0.00348 |
| C | -1.14611 | 0.22079  | -0.00228 |
| O | -1.70000 | -2.10069 | 0.00119  |
| O | 0.88972  | -2.77419 | 0.00297  |
| H | 1.84908  | -2.91258 | 0.00461  |
| H | -2.20618 | 0.46042  | -0.00299 |
| H | 2.63201  | -0.69346 | 0.00041  |
| H | 1.91651  | 1.71161  | -0.00345 |
| C | -0.60310 | 2.65039  | -0.00581 |
| O | 0.15290  | 3.60469  | -0.00692 |
| H | -1.70604 | 2.80095  | -0.00652 |
| H | -1.23292 | -2.95368 | 0.00290  |

Product for the hydrogenolysis of F6 on Compound 2

20

|   |          |          |          |
|---|----------|----------|----------|
| C | 1.78229  | 0.49301  | -0.01904 |
| C | 1.04368  | -0.66808 | -0.24003 |
| C | 1.14495  | 1.72943  | 0.11388  |
| C | -0.36162 | -0.58434 | -0.30979 |
| C | -0.24516 | 1.83403  | 0.03139  |

|   |          |          |          |
|---|----------|----------|----------|
| C | -0.97879 | 0.65637  | -0.17528 |
| O | -1.14177 | -1.68363 | -0.57751 |
| O | 1.62264  | -1.90108 | -0.40375 |
| H | 2.58520  | -1.79721 | -0.34737 |
| C | -1.14908 | -2.70464 | 0.42273  |
| H | -1.85361 | -3.46273 | 0.07251  |
| H | -1.49633 | -2.30516 | 1.38535  |
| H | -0.15930 | -3.15381 | 0.54831  |
| H | -2.06325 | 0.68282  | -0.24527 |
| H | 2.86826  | 0.43135  | 0.03944  |
| H | 1.74554  | 2.62026  | 0.27979  |
| C | -0.94721 | 3.16644  | 0.15912  |
| H | -0.23952 | 3.96704  | 0.39738  |
| H | -1.70775 | 3.14817  | 0.94953  |
| H | -1.45904 | 3.44298  | -0.77162 |

Product for the hydrogenation of F2 on Compound 3

26

|   |          |          |          |
|---|----------|----------|----------|
| C | 1.93746  | -0.63733 | -0.00537 |
| C | 1.39372  | 0.65478  | -0.00136 |
| C | 0.01435  | 0.84265  | -0.00269 |
| C | -0.81125 | -0.29911 | -0.00826 |
| C | -0.28405 | -1.58744 | -0.01223 |
| C | 1.11985  | -1.75915 | -0.01075 |
| O | 1.59331  | -3.04324 | -0.01486 |
| H | 3.01858  | -0.76988 | -0.00433 |
| H | -1.88798 | -0.16166 | -0.00951 |
| O | -1.01565 | -2.73938 | -0.01772 |
| H | 2.06822  | 1.50424  | 0.00271  |
| C | -0.64504 | 2.21312  | 0.00215  |
| C | -2.42732 | -2.62861 | -0.01941 |
| H | -2.80711 | -3.65211 | -0.02375 |
| H | -2.79215 | -2.10272 | -0.91241 |
| H | -2.79482 | -2.10932 | 0.87634  |
| H | 2.56235  | -3.00633 | -0.01385 |
| C | 0.29307  | 3.42534  | -0.00115 |
| H | -1.30576 | 2.28482  | 0.87964  |
| H | -1.31432 | 2.28657  | -0.86862 |
| H | 0.95311  | 3.38257  | 0.87556  |
| C | -0.46986 | 4.75401  | 0.00170  |
| H | 0.94689  | 3.38241  | -0.88251 |
| H | -1.10893 | 4.84340  | 0.88884  |
| H | -1.11521 | 4.84359  | -0.88086 |
| H | 0.21746  | 5.60743  | -0.00064 |

Product for the hydrogenolysis of F4 on compound 4

23

|   |          |          |          |
|---|----------|----------|----------|
| C | -1.47122 | -1.07961 | -0.05197 |
| C | -1.79902 | 0.20993  | -0.47495 |
| C | -0.82162 | 1.20177  | -0.55888 |
| C | 0.50281  | 0.89319  | -0.19198 |



|   |          |          |          |
|---|----------|----------|----------|
| C | 0.81077  | -0.39945 | 0.22704  |
| C | -0.15899 | -1.40917 | 0.29947  |
| C | 0.21630  | -2.81704 | 0.71329  |
| H | -2.82562 | 0.44922  | -0.74979 |
| O | -1.08916 | 2.47626  | -0.99039 |
| O | 1.51915  | 1.81234  | -0.29700 |
| H | 1.84438  | -0.60284 | 0.49553  |
| C | 0.72185  | -3.67545 | -0.46006 |
| H | -2.25179 | -1.83482 | 0.00236  |
| H | 1.60939  | -3.22693 | -0.92041 |
| H | -0.04466 | -3.76574 | -1.23804 |
| H | 0.98648  | -4.68469 | -0.12314 |
| H | -2.03017 | 2.53127  | -1.21830 |
| C | 1.43202  | 2.94440  | 0.57127  |
| H | 2.33772  | 3.52914  | 0.39371  |
| H | 1.40587  | 2.62820  | 1.62300  |
| H | 0.55166  | 3.55556  | 0.35067  |
| H | -0.65295 | -3.30747 | 1.16976  |
| H | 0.99199  | -2.77799 | 1.48898  |

Product for the hydrogenation of F1, i.e., Compound 2

21

|   |          |          |          |
|---|----------|----------|----------|
| C | 1.85630  | 0.06692  | -0.20577 |
| C | 1.09403  | -1.09311 | -0.35381 |
| C | 1.24464  | 1.31423  | -0.07807 |
| C | -0.31086 | -0.99883 | -0.34685 |
| C | -0.14778 | 1.42080  | -0.08500 |
| C | -0.90809 | 0.25268  | -0.20914 |
| O | -1.11610 | -2.09718 | -0.53133 |
| O | 1.65384  | -2.33523 | -0.51061 |
| H | 2.61887  | -2.23941 | -0.50028 |
| H | -1.99456 | 0.28961  | -0.20649 |
| H | 2.94308  | -0.00884 | -0.20082 |
| H | 1.84799  | 2.20758  | 0.03986  |
| C | -0.82830 | 2.76729  | -0.00266 |
| O | -0.03333 | 3.65585  | 0.77799  |
| H | -0.39652 | 4.54713  | 0.66682  |
| H | -1.83334 | 2.64462  | 0.43227  |
| H | -0.96862 | 3.17350  | -1.01933 |
| C | -1.07261 | -3.08547 | 0.50072  |
| H | -1.80583 | -3.84518 | 0.21967  |
| H | -1.35472 | -2.65061 | 1.46920  |
| H | -0.08188 | -3.54303 | 0.57950  |

## 7. $^1\text{H}$ and $^{13}\text{C}$ NMR of isolated products

**Figure S7:** 2-methoxy-4-(methoxymethyl)phenol **C** ( $^1\text{H}$  NMR in  $\text{CDCl}_3$ )

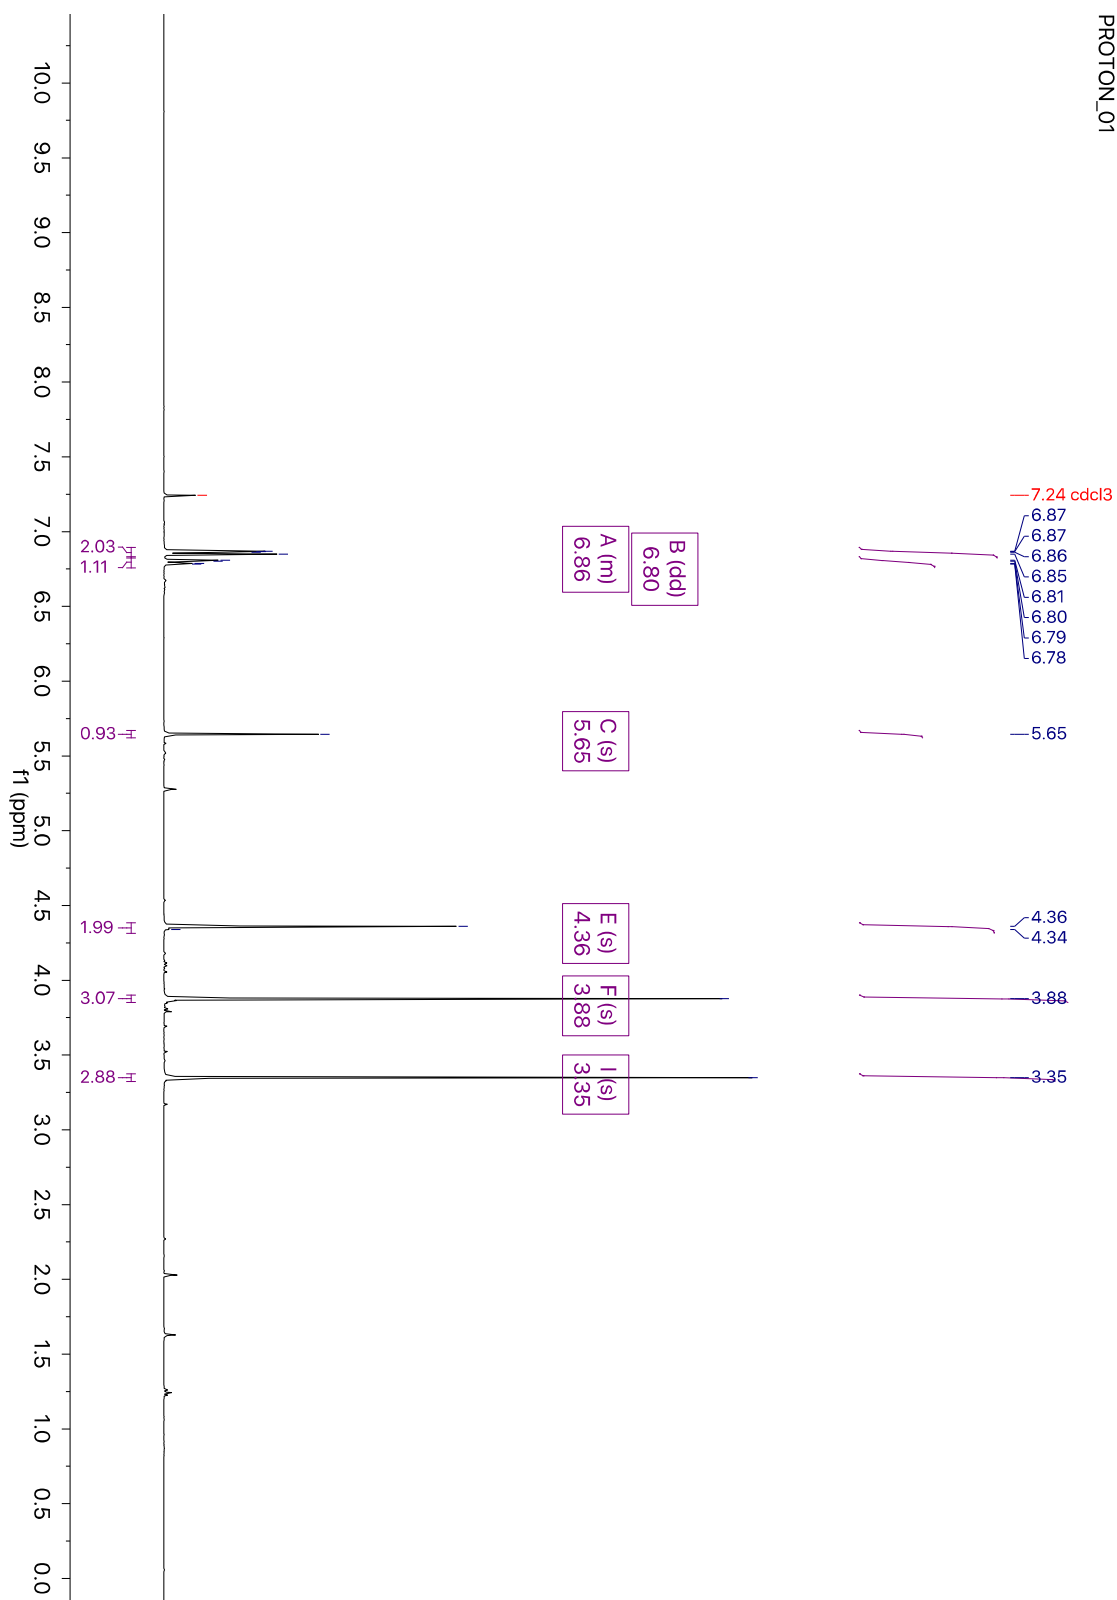

**Figure S8:** 2-methoxy-4-(methoxymethyl)phenol **C** ( $^{13}\text{C}$  NMR in  $\text{CDCl}_3$ )

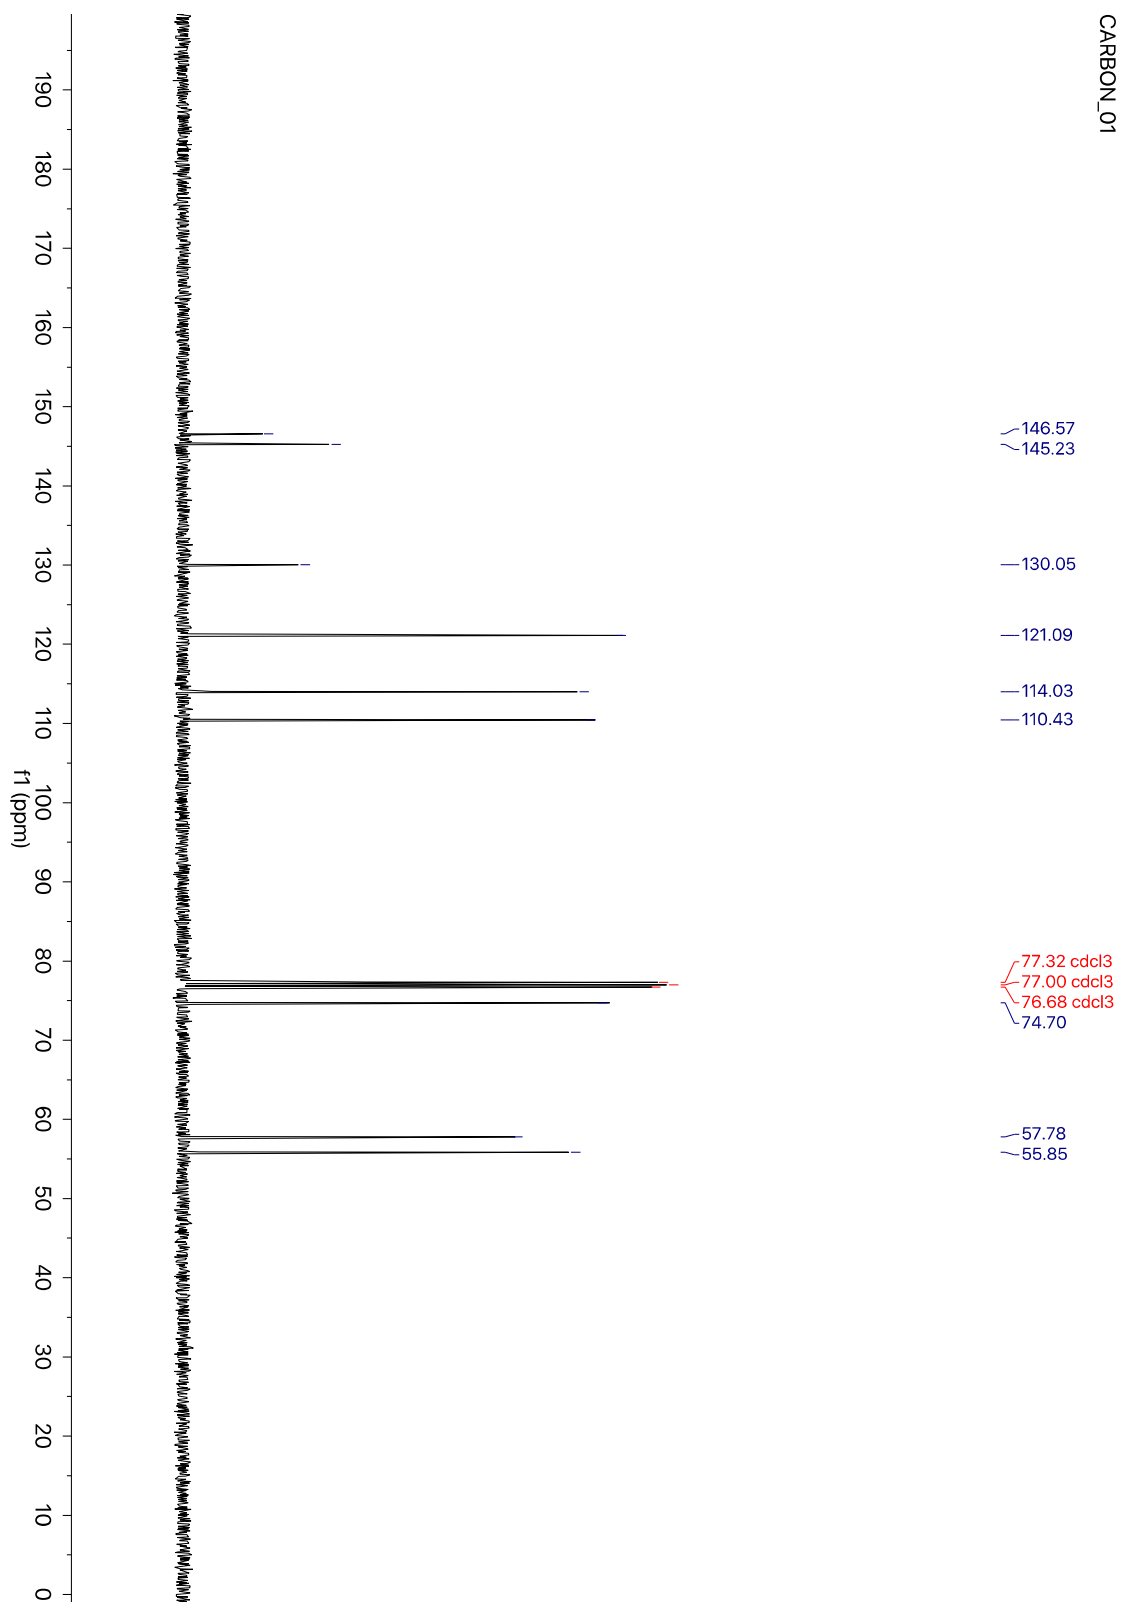

**Figure S9:** *Creosol* ( $^1\text{H}$  NMR in  $\text{CDCl}_3$ )

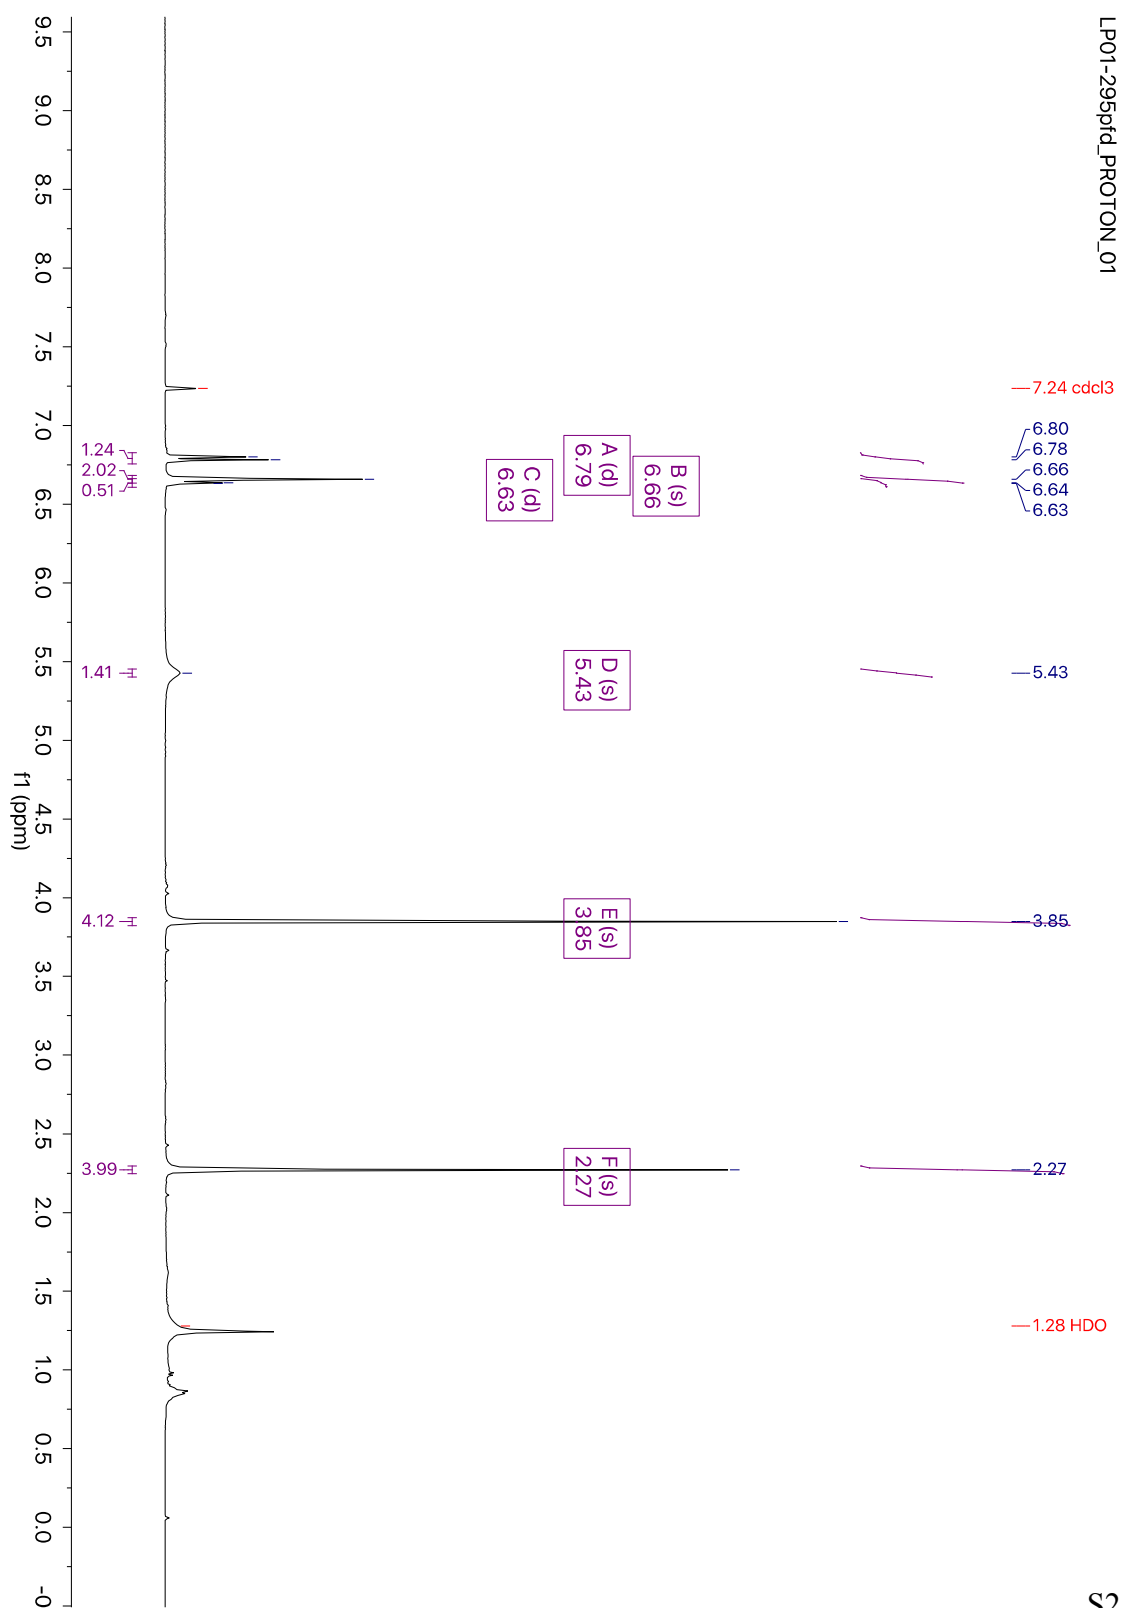

**Figure S10:** *Creosol* ( $^1\text{H}$  NMR in  $\text{CDCl}_3$ )

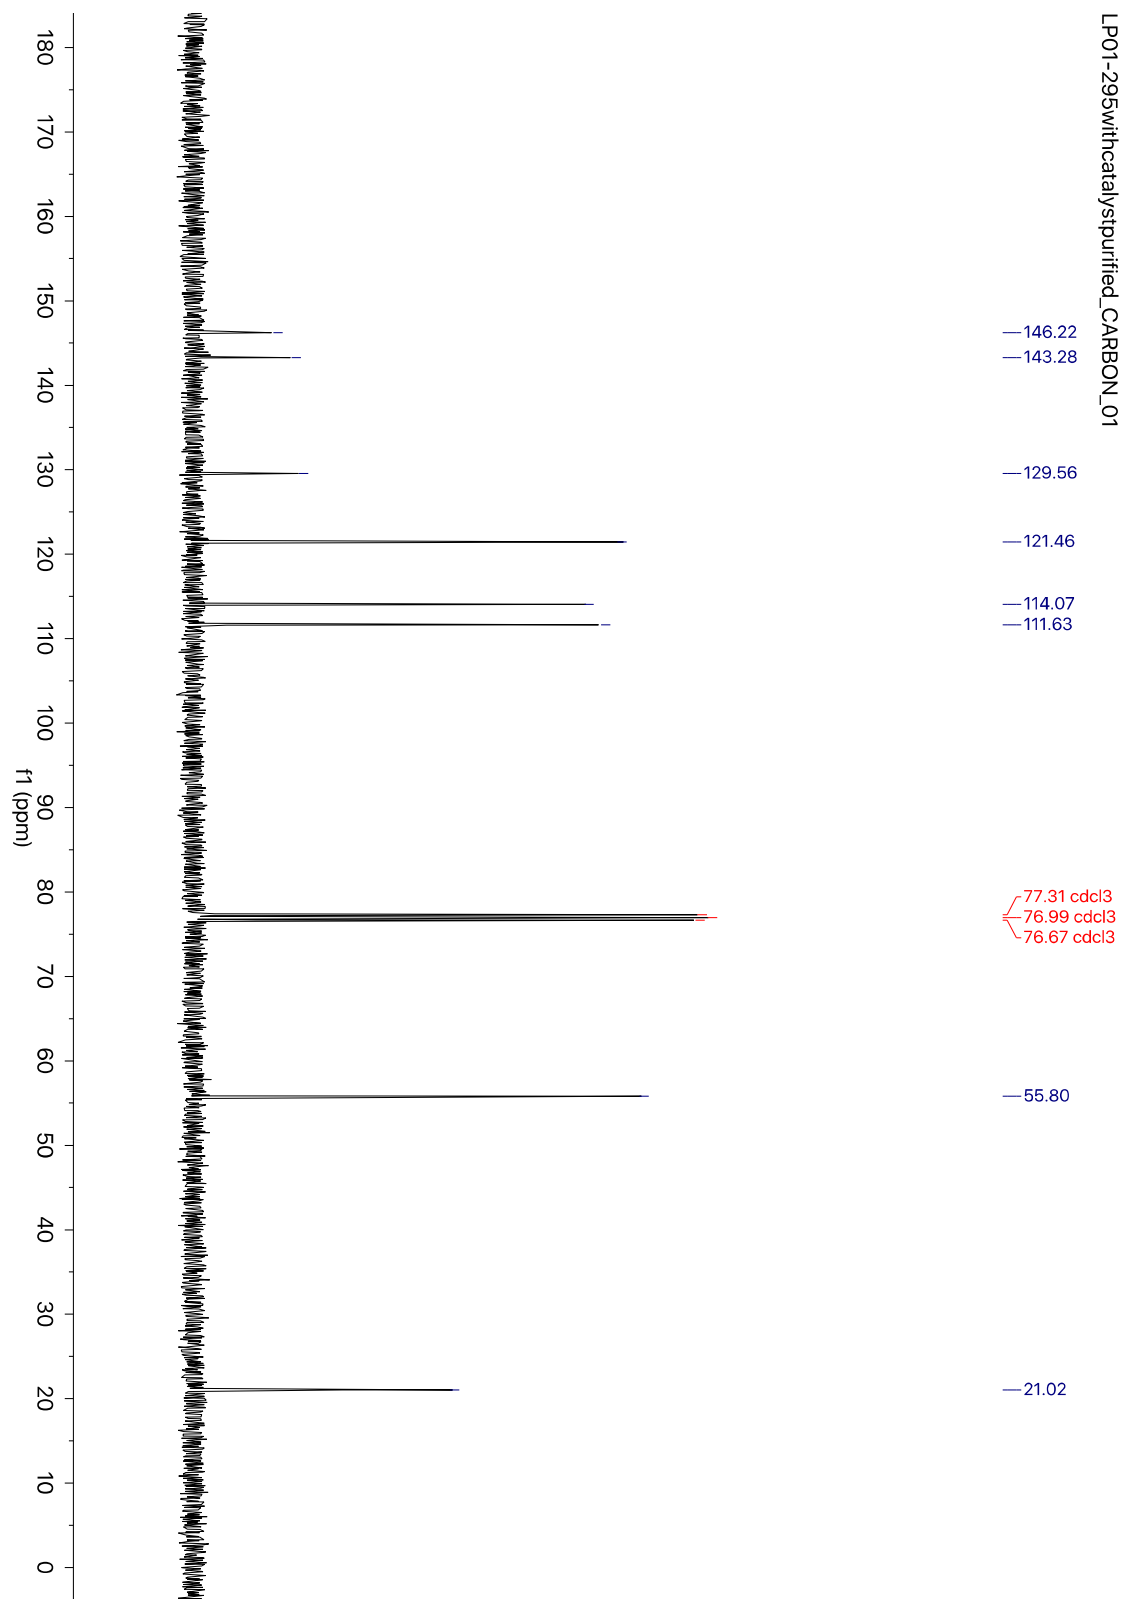

## 6. References

1. Davidson, D. W., *Can. J. Chem.* **1957**, 35 (5), 458-473.
2. Pereira, S. M.; Iglesias, T. P.; Legido, J. L.; Rivas, M. A.; Real, J. N., Relative permittivity increments for  $x\text{CH}_3\text{OH} + (1-x)\text{CH}_3\text{OCH}_2(\text{CH}_2\text{OCH}_2)_3\text{CH}_2\text{OCH}_3$  from  $T = 283.15\text{ K}$  to  $T = 323.15\text{ K}$ . *J. Chem. Thermodyn.* **2001**, 33, 433-440.
3. Shirke, R. M.; Chaudhari, A.; More, N. M.; Patil, P. B., Dielectric Measurements on Methyl Acetate + Alcohol Mixtures at (288, 298, 308, and 318) K Using the Time Domain Technique. *J. Chem. Eng. Data* **2000**, 45 (5), 917-919.
4. Shirke, R. M.; Chaudhari, A.; More, N. M.; Patil, P. B., Temperature dependent dielectric relaxation study of ethyl acetate — Alcohol mixtures using time domain technique. *J. Mol. Liq.* **2001**, 94 (1), 27-36.
5. Khimenko, M. T.; Aleksandrov, V. V.; Gritsenko, N. N., Polarizability and Radii of Molecules of Some Pure Liquids. *Zh. Fiz. Khim.* **1973**, 47, 2914-1915.
6. Granzhan, V. A.; Kirillova, O. G., Physico-Chemical Study of N-Methyl-2-Pyrrolidone-Methanol System. *Zh. Prikl. Khim.* **1970**, 43, 1875-1877.
7. Ellerbrock, P.; Armanino, N.; Ilg, M. K.; Webster, R.; Trauner, D., An eight-step synthesis of epicolactone reveals its biosynthetic origin. *Nat Chem* **2015**, 7 (11), 879-882.
8. Modvig, A.; Andersen, T. L.; Taaning, R. H.; Lindhardt, A. T.; Skrydstrup, T., Two-Chamber Hydrogen Generation and Application: Access to Pressurized Deuterium Gas. *J. Org. Chem.* **2014**, 79 (12), 5861-5868.
